# Supplementary material for: A novel and sensitive ratiometric fluorescent quantum dot-based biosensor for alkaline phosphatase detection in biological samples via the inner-filter effect
Source: Royal Society of Chemistry journal article supplement (doi:10.1039/d2ra06956c), 2023-01-01
Supplement: d2ra06956c1.pdf [file d2ra06956c1.pdf]

## Supplementary Information

### **A novel and sensitive ratiometric fluorescent quantum dot-based biosensor for alkaline phosphatase detection in biological samples via inner-filter effect**

Penghui Hu<sup>a,b</sup>, Ruiyan Huang<sup>a,b</sup>, Ye Xu<sup>a,b</sup>, Tengfei Li<sup>c</sup>, Jun Yin<sup>a,b</sup>, Yu Yang<sup>a,b</sup>, Yuan Liang<sup>a,b</sup>, Xiaohan Mao<sup>d</sup>, Li Ding<sup>a,b</sup>, Chang Shu<sup>a,b\*</sup>

<sup>a</sup> Key Laboratory of Drug Quality Control and Pharmacovigilance (China Pharmaceutical University), Ministry of Education, Nanjing 210009, China

<sup>b</sup> Department of Pharmaceutical Analysis, School of Pharmacy, China Pharmaceutical University, Nanjing 211198, China

<sup>c</sup> School of Pharmacy, Department of Clinical Pharmacology, Sir Run Run Hospital, Nanjing Medical University, Nanjing 211166, China

<sup>d</sup> Department of Pharmaceutical Engineering, School of engineering, China Pharmaceutical University, Nanjing 211198, China

**Corresponding author E-mail:** [shuchang@cpu.edu.cn](mailto:shuchang@cpu.edu.cn) (Chang Shu)

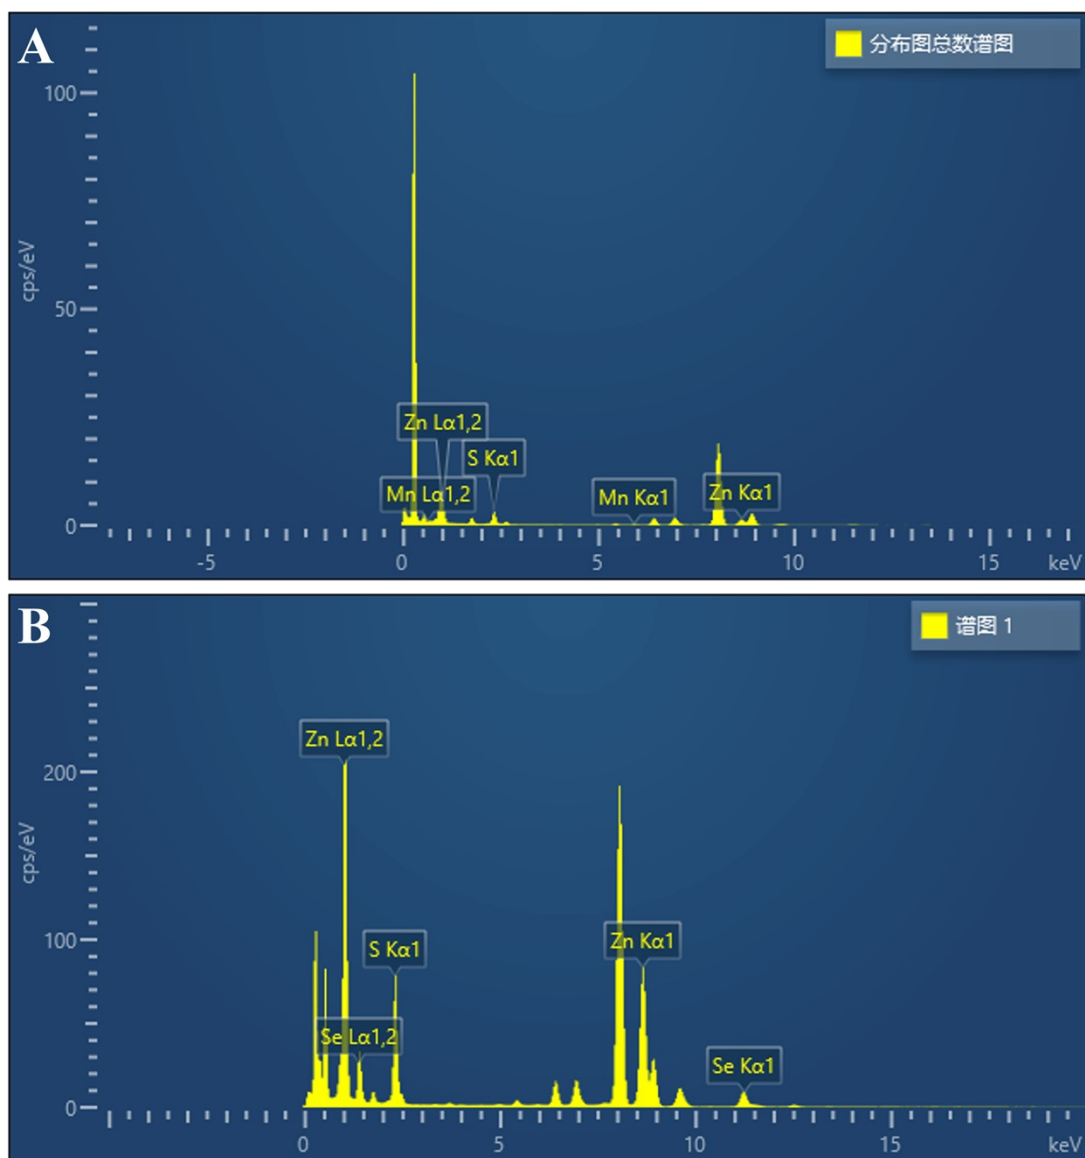

**Fig.S1** The EDS spectra of oil-dispersible Mn:ZnS QDs (A) and ZnSe@ZnS QDs (B).

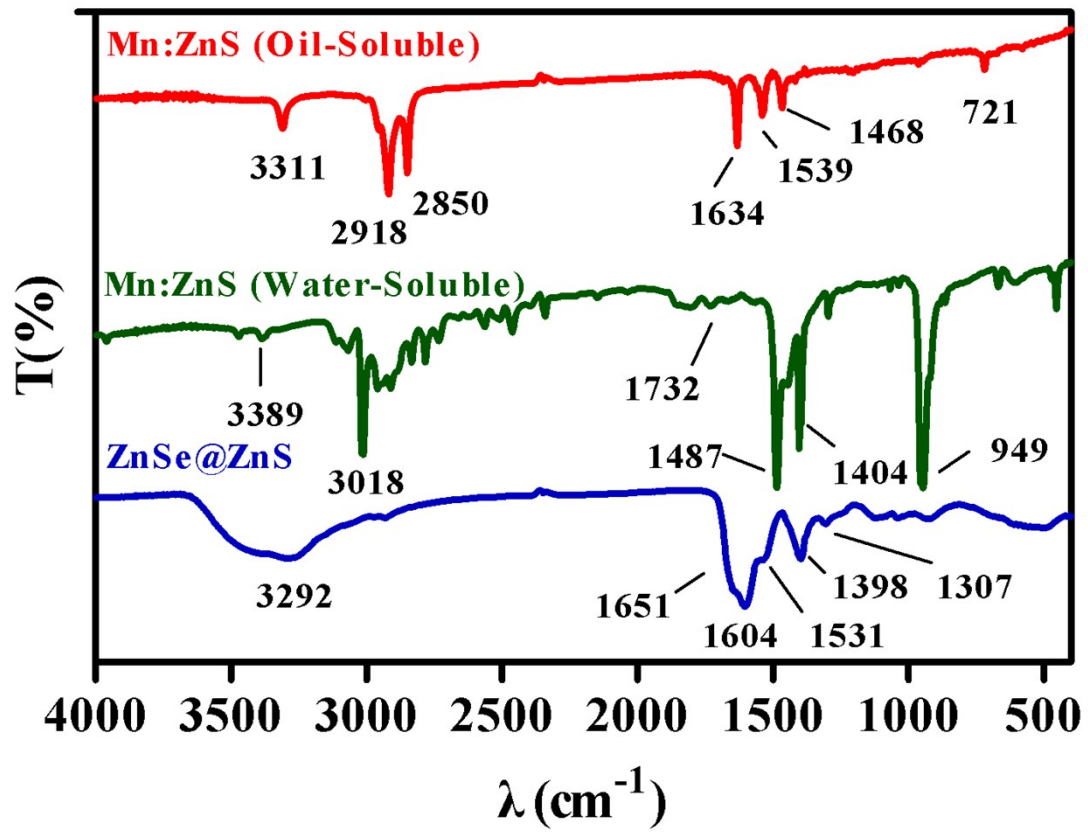

Fig.S2 The FTIR spectra of Mn:ZnS QDs and ZnSe@ZnS QDs.

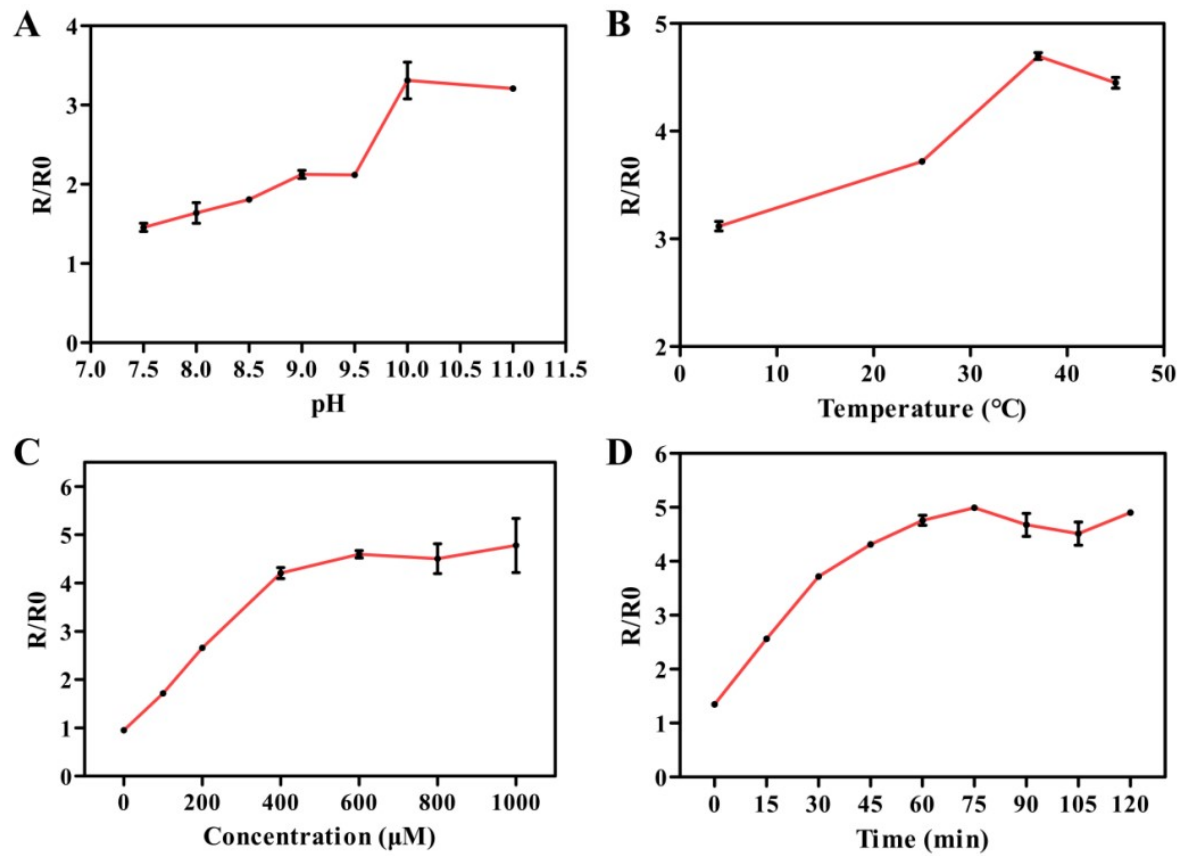

**Fig.S3** The optimization of condition for ALP activity detection. The effects of pH of incubation buffer (A), temperature (B), concentration of PNPP in incubation buffer (C) and incubation time (D) on R/R0 was investigated, respectively. R and R0 are the values of  $F_{585}/F_{405}$  in the presence and absence of ALP, respectively.

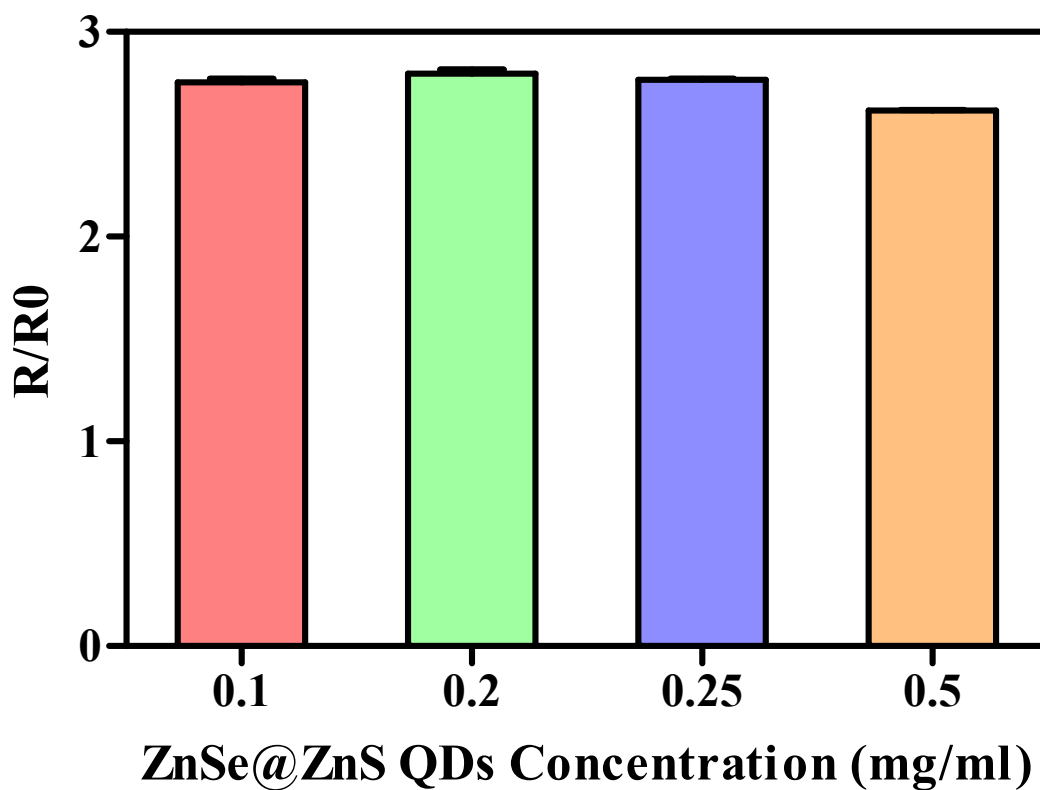

**Fig.S4** The influence of the ratio of Mn:ZnS QDs to ZnSe@ZnS QDs on the detection signals. The concentration of Mn:ZnS QDs was fixed at 10 mg/ml while the concentration of ZnSe@ZnS QDs changed from 0.1 mg/ml to 0.5 mg/ml. The ALP activity of samples was set at 100 U/L. R and R0 are the values of F585/F405 in the presence and absence of ALP, respectively.

**Table S1.** Calculation of fluorescence quantum yield of Mn:ZnS QDs

|                               | Refractive Index<br>(25 °C) | OD<br>(275 nm) | I<br>(450-700 nm) | $\Phi$ |
|-------------------------------|-----------------------------|----------------|-------------------|--------|
| Rhodamine 6G                  | 1.383<br>(Ethyl Alcohol)    | 0.048          | 688703            | 0.95   |
| Mn:ZnS QDs<br>(Oil-Soluble)   | 1.372<br>(n-Hexane)         | 0.037          | 181333            | 0.33   |
| Mn:ZnS QDs<br>(Water-Soluble) | 1.332<br>(Water)            | 0.018          | 81386             | 0.27   |

**Table S2.** Calculation of fluorescence quantum yield of ZnSe@ZnS QDs

|              | Refractive Index<br>(25 °C) | OD<br>(310 nm) | I<br>(310-450 nm) | $\Phi$ |
|--------------|-----------------------------|----------------|-------------------|--------|
| L-Tryptophan | 1.332<br>(Water)            | 0.069          | 260741            | 0.14   |
| ZnSe@ZnS QDs | 1.332<br>(Water)            | 0.033          | 218793            | 0.25   |

**Table S3.** Comparison of performance of different analytical methods for ALP activity detection.

| Material/Probe           | Mechanism  | Linear Range<br>(U/L) | LOD<br>(U/L) | Ref.      |
|--------------------------|------------|-----------------------|--------------|-----------|
| AgS <sub>2</sub> QDs     | AIE        | 2-100                 | 1.28         | 1         |
| CdTe/ZnS QDs             | IFE        | 2.2-220               | 0.34         | 2         |
| TPEPy-pY                 | AIE        | 1-1000                | 6.6          | 3         |
| FAS-P                    | ESIPT      | 1-100                 | 0.6          | 4         |
| QMTP                     | AIE        | 0-1200                | 5.6          | 5         |
| AgNPs                    | LSPR       | 5-70                  | 1.1          | 6         |
| CDs                      | IFE & SQE  | 5-200                 | 1.2          | 7         |
| QX-P                     | ICT        | 50-1000               | 17           | 8         |
| CDs@Tb-GMP               | IFE        | 0.5-80                | 0.13         | 9         |
| Luminol-SiNPs            | ECRET      | 5-50                  | 0.8          | 10        |
| 3D origami $\mu$ PAD     | IFE        | 5-350                 | 3.6          | 11        |
| PEI-Cu NCs               | EET & FRET | 1-100                 | 0.27         | 12        |
| Mn:ZnS QDs & ZnSe@ZnS QD | IFE        | 4-96                  | 0.57         | This work |

## Reference

- 1 M. Cai, C. Ding, F. Wang, M. Ye, C. Zhang and Y. Xian, *Biosens Bioelectron*, 2019, **137**, 148–153.
- 2 G. Mao, Q. Zhang, Y. Yang, X. Ji and Z. He, *Anal Chim Acta*, 2019, **1047**, 208–213.
- 3 X. Zhang, C. Ren, F. Hu, Y. Gao, Z. Wang, H. Li, J. Liu, B. Liu and C. Yang, *Anal Chem*, 2020, **92**, 5185–5190.
- 4 Y. Li, R. Xie, X. Pang, Z. Zhou, H. Xu, B. Gu, C. Wu, H. Li and Y. Zhang, *Talanta*, , DOI:10.1016/j.talanta.2019.120143.
- 5 M. Zhao, Y. Gao, S. Ye, J. Ding, A. Wang, P. Li and H. Shi, *Analyst*, 2019, **144**, 6262–6269.
- 6 Y. J. Zhang, L. Guo, S. Chen, Y. L. Yu and J. H. Wang, *Anal Chim Acta*, 2020, **1108**, 54–60.
- 7 X. Tong, Y. Zhu, C. Tong, S. Shi, R. Long and Y. Guo, *Anal Chim Acta*, , DOI:10.1016/j.aca.2021.338829.
- 8 W. X. Wang, W. L. Jiang, H. Guo, Y. Li and C. Y. Li, *Chemical Communications*, 2021, **57**, 480–483.
- 9 W. Sun, X. Han, F. Qu, R. M. Kong and Z. Zhao, *Analyst*, 2021, **146**, 2862–2870.
- 10 W. Qi, Y. Fu, M. Zhao, H. He, X. Tian, L. Hu and Y. Zhang, *Anal Chim Acta*, 2020, **1097**, 71–77.
- 11 Y. Zhu, X. Tong, Q. Wei, G. Cai, Y. Cao, C. Tong, S. Shi and F. Wang, *Biosens Bioelectron*, , DOI:10.1016/j.bios.2021.113691.
- 12 X. Huang, M. Lan, J. Wang, L. Guo, Z. Lin, F. Zhang, T. Zhang, C. Wu and B. Qiu, *Anal Chim Acta*, 2021, **1142**, 65–72.
